# Supplementary material for: Fruit Characteristics, Peel Nutritional Compositions, and Their Relationships with Mango Peel Pectin Quality
Source: MDPI journal article supplement (doi:10.3390/plants10061148), 2021-06-04

**Table S1.** The correlation graph of the expected and predicted pectin quality values by fruit physiological properties and proximate compositions of peel using PLS model.

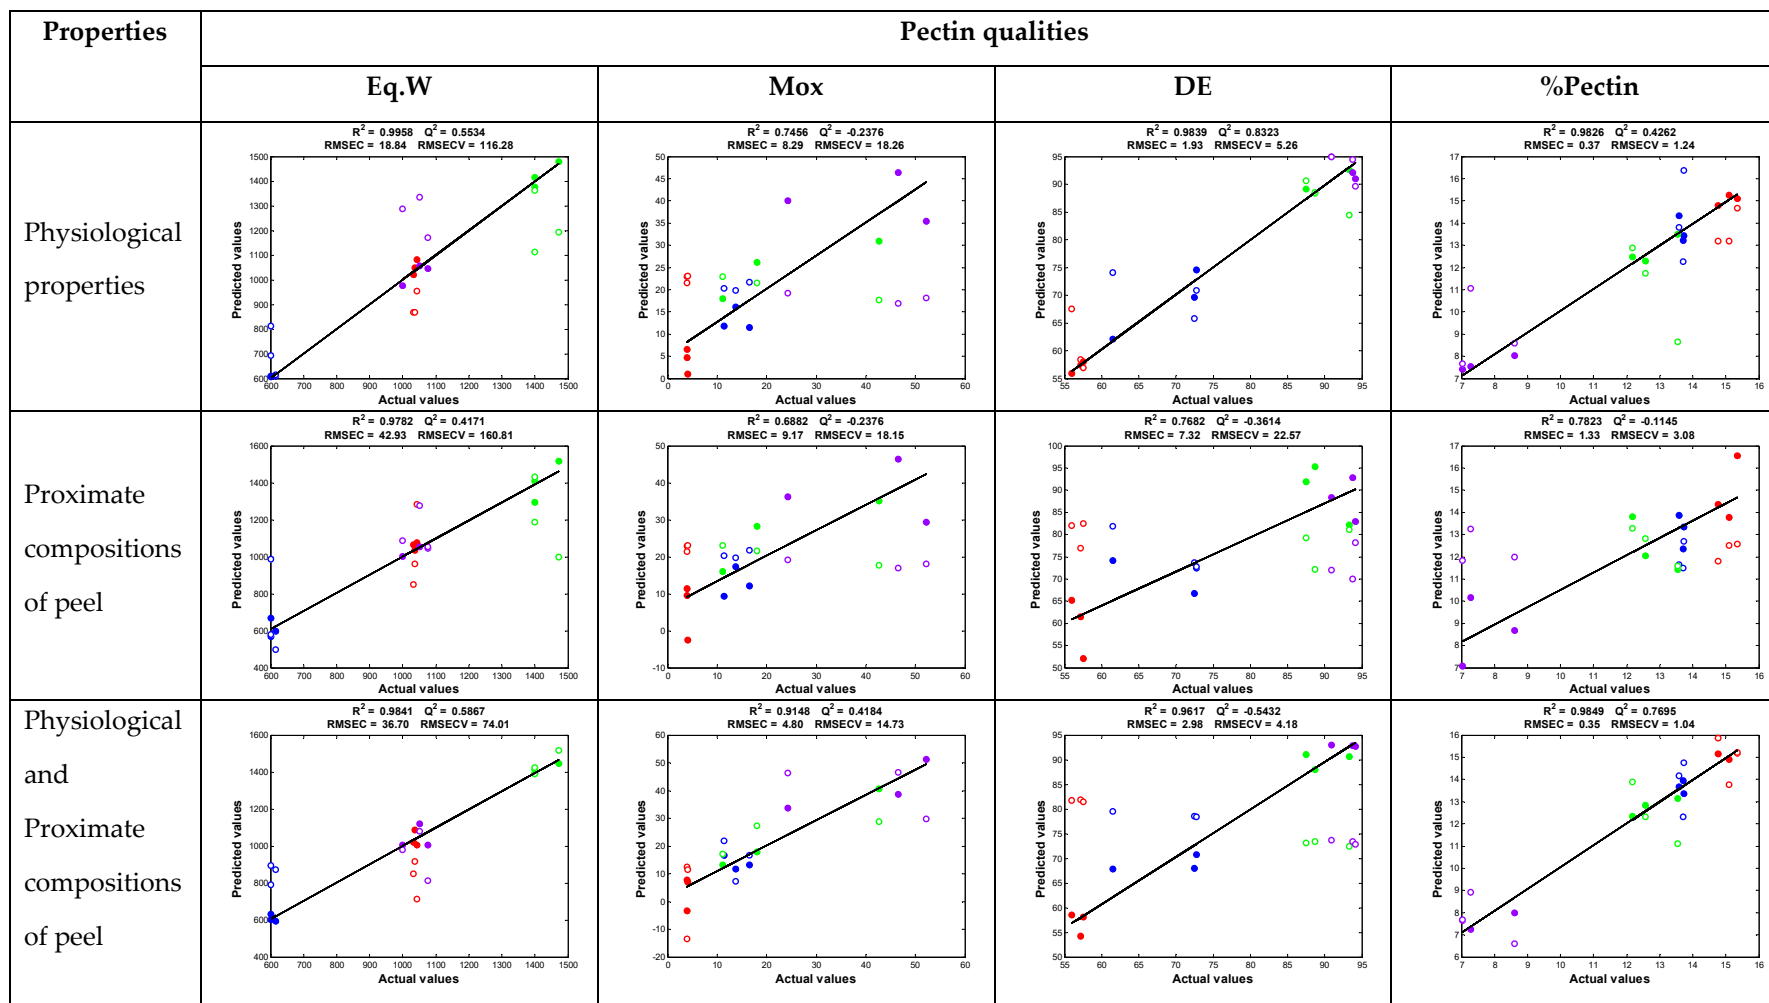

Supplement: s1 [file s1]
